# Supplementary material for: Selective grain boundary passivation by ammonium nitrate for enhanced performance and stability of FA-Cs based perovskite solar cells
Source: Royal Society of Chemistry journal article supplement (doi:10.1039/d3cc05504c), 2024-01-01
Supplement: d3cc05504c1.pdf [file d3cc05504c1.pdf]

## *Supporting information*

### **Selective grain boundaries passivation by ammonium nitrate for enhanced performance and stability of FA-Cs based perovskite solar cells**

Xiaoshan Li,<sup>a†</sup> Wenjing Yu,<sup>a,b†</sup> Tian Hou,<sup>a</sup> Xin Yang,<sup>a</sup> Xin Wang,<sup>a</sup> Guangmian Jiang,<sup>a</sup> Zhipeng Fu,<sup>a</sup>  
Kaipeng Chen,<sup>a</sup> Yanlin Li,<sup>a</sup> Chengbin Yang,<sup>a</sup> Xiaoran Sun<sup>\*a</sup>, Meng Zhang<sup>\*a,c</sup>

#### **Author address**

<sup>a</sup> School of New Energy and Materials, Southwest Petroleum University (SWPU), Chengdu, 610500, China

<sup>b</sup> Sichuan Shale Gas Project Management Department, CNPC Bohai Drilling Engineering Co. Ltd., Chengdu 610057, China

<sup>c</sup> The Australian Centre for Advanced Photovoltaics, School of Photovoltaic and Renewable Energy Engineering, University of New South Wales, Sydney, NSW 2052, Australia

† These authors contribute equally to this work

#### **Corresponding Author**

E-mail: meng.zhang@unsw.edu.au; xiaoran.sun@swpu.edu.au;

## Experimental

### Materials

Ammonium nitrate ( $\text{NH}_4\text{NO}_3$ , 99.85%) was purchased from aladdin. Formamidinium iodide (FAI, 99.5%), lead iodide ( $\text{PbI}_2$ , 99.99%), cesium iodide (CsI, 99.99%), spiro-OMeTAD (99.5%), bis (trifluoromethane) sulfonimide lithium salt (Li-TFSI, >99%) and 4-*tert*-butylpyridine (TBP, >96%) were purchased from Xi'an Polymer Light Technology Corp.  $\text{SnO}_2$  colloidal solution [15%tin (IV) in  $\text{H}_2\text{O}$  colloidal dispersion] was purchased from Alfa Aesar. The solvents tetramethylene sulfoxide (TMSO, >95.0%), N, N-dimethylformamide (DMF, anhydrous, 99.8%), isopropanol (IPA, anhydrous, 99.9%), acetonitrile (anhydrous, 99.8%) and chlorobenzene (CB, anhydrous, 99.8%) were purchased from Sigma-Aldrich. All chemicals and reagents were directly used as received.

### Device fabrication

ITO glass substrates were cleaned subsequently with detergent (5 vol% in deionized water), acetone, isopropanol and ethanol for 20 min respectively. The substrates were dried by  $\text{N}_2$  gas. Prior to electron transporting layer (ETL) deposition, the substrates were further cleaned with UV-ozone for 15 min. The  $\text{SnO}_2$  colloidal dispersion (15% in water, Alfa Aesar) diluted with deionized water (1:3 wt) with an additive of 4 vol% polyethylene glycol (Alfa Aesar) and 8 vol% Triton X-100 (Aladdin) was spin-coated on the ITO substrate at 3000 rpm for 30 s, followed by annealing at 150°C for 30 min and UV-ozone treatment for 15 min.

The  $\text{FA}_{0.9}\text{Cs}_{0.1}\text{PbI}_3$ -based perovskite precursor solution was prepared by mixing  $\text{PbI}_2$  (1.5 M), FAI (1.35 M), and CsI (0.15 M) in a mixed solvent (DMF: TMSO=9:1, v/v). The perovskite precursor solution was spin-coated onto  $\text{SnO}_2$  with a two-step spinning procedure (1,000 rpm for 5 s and 4,000 rpm for 30 s). During the second step, Gas-quenching ( $\text{N}_2$ ) was sprayed on the wet film 20 s before stopping, the gas-pressure at the regulator was set to 0.3 MPa. Subsequently the deposited perovskite layer was annealed at 150 °C for 20 min. The passivation layer was prepared by dissolving 1 mg  $\text{NH}_4\text{NO}_3$  in 1 mL IPA, and was spin-coated on top of the perovskite layer at 4,000 rpm

for 30 s. The hole transporting layer was spin-coated on top of the passivation layer at 4,000 rpm for 30 s using a spiro-OMeTAD solution dissolving 72.3 mg spiro-OMeTAD, 17.5  $\mu\text{L}$  Li-TFSI stock solution (520  $\text{mg}\cdot\text{mL}^{-1}$  acetonitrile), 28.8  $\mu\text{L}$  TBP in 1 mL chlorobenzene. After deposition, the sample was oxidized for 4 h in a pure oxygen atmosphere for 40  $^{\circ}\text{C}$ . Finally, about 100 nm silver electrodes were prepared by thermal evaporation.

## Characterization

The top-viewed scanning electron microscope (SEM) images films were observed using scanning electron microscope (FEI INSPECT F50, U.S.A.). Atomic force microscope (AFM) images were scanned by AFM (KEYSIGHT Technologies 7500). The XRD spectra of the MA-free perovskite films were measured by an X-ray diffractometer (X'Pert Pro MPD, PANalytical). Steady-state photoluminescence (PL) was characterized by a FLS980 (Edinburgh Instruments Ltd) with an excitation at 468 nm. The current-voltage (J-V) characteristics were measured by a Keithley B2901A source and the solar simulator with standard AM 1.5G (100  $\text{mW}\cdot\text{cm}^{-2}$ , SS-F5-3A, Enlitech) under ambient conditions. The J-V curves were measured by forward (-0.2 to 1.2 V) or reverse (1.2 to -0.2 V) scans with a delay time of 0.02 s for each point.

The *CPD* value is the contact potential difference between the metallic KPFM tip and the sample, which can be derived as work function difference between the tip and the sample by the following equation (1):<sup>1, 2</sup>

$$CPD = \frac{\phi_{tip} - \phi_{sample}}{e} \quad (1)$$

where  $\phi_{tip}$  is the work function of the KPFM tip,  $\phi_{sample}$  is the work function of the sample surface and  $e$  is the electronic charge. Calibration gives a  $CPD_{tip}$  of 0.430 V and a  $\phi_{tip}$  of 5.03 eV for the KPFM tip.

The trap density in the perovskite films is assessed by SCLC of electron-only devices (ITO/SnO<sub>2</sub>/Perovskite/NH<sub>4</sub>NO<sub>3</sub>/PCBM/BCP/Ag). The trap-filled limit voltage ( $V_{TFL}$ ), from which the trap density ( $n_t$ ) can be calculated by equation (2):<sup>3</sup>

$$V_{TFL} = \frac{qn_p L^2}{2\epsilon\epsilon_0} \quad (2)$$

Where  $\epsilon$  is the relative dielectric constant of perovskite,  $\epsilon_0$  is the vacuum permittivity,  $q$  is the elementary charge, and  $L$  is the thickness of the perovskite film.

The average TRPL decay lifetime ( $\tau_{ave}$ ) can be obtained using the following equation (3):<sup>4</sup>

$$\tau_{ave} = \frac{A_1\tau_1^2 + A_2\tau_2^2}{A_1\tau_1 + A_2\tau_2} \quad (3)$$

Where  $A_1$  and  $A_2$  are constants representing the contributions of the fast and slow components, respectively.  $\tau_1$  is the fast decay process related to bimolecular recombination, and  $\tau_2$  is the slow decay process associated with trap-assisted recombination.

The humidity stability test of the devices is carried out in ambient air without humidity control, where the average RH is recorded every 12 hours.

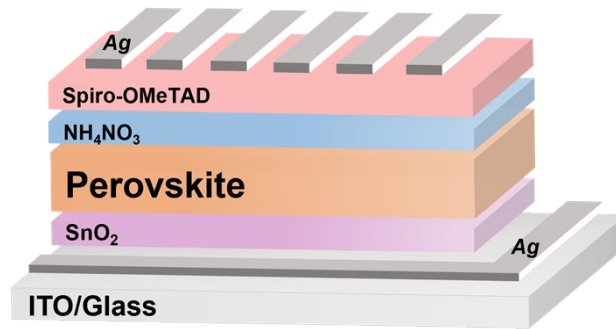

**Fig. S1** Device structure of PSCs with  $\text{NH}_4\text{NO}_3$ .

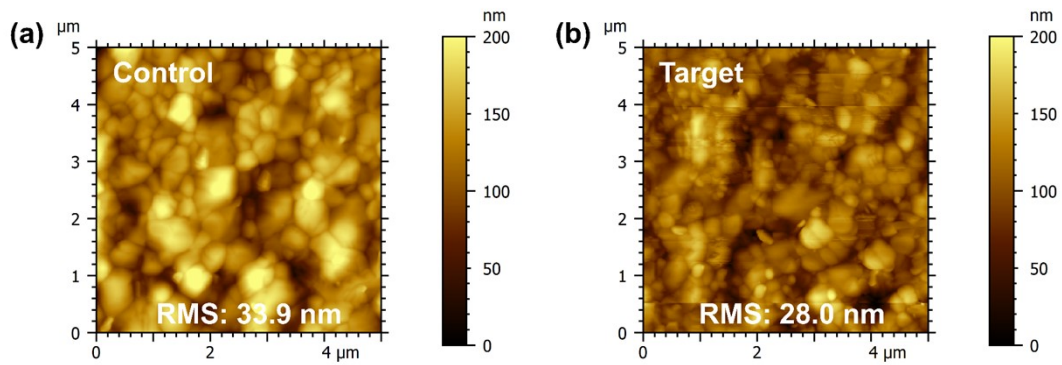

**Fig. S2** (a) and (b) RMS of the perovskite film before and after  $\text{NH}_4\text{NO}_3$  passivation by AFM.

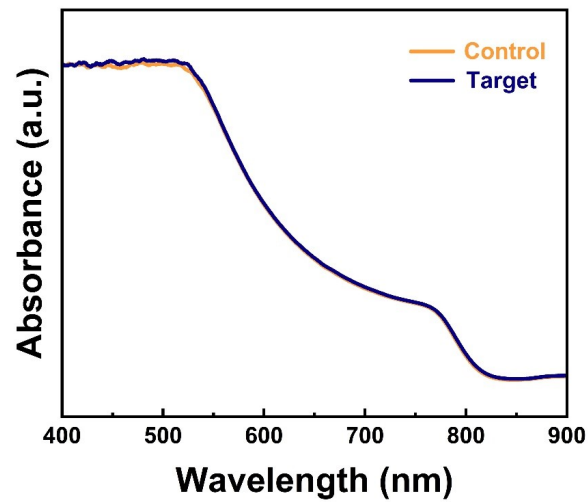

**Fig. S3** UV-vis absorption spectra of pristine perovskite film, and perovskite films with  $\text{NH}_4\text{NO}_3$  (1 mg/mL).

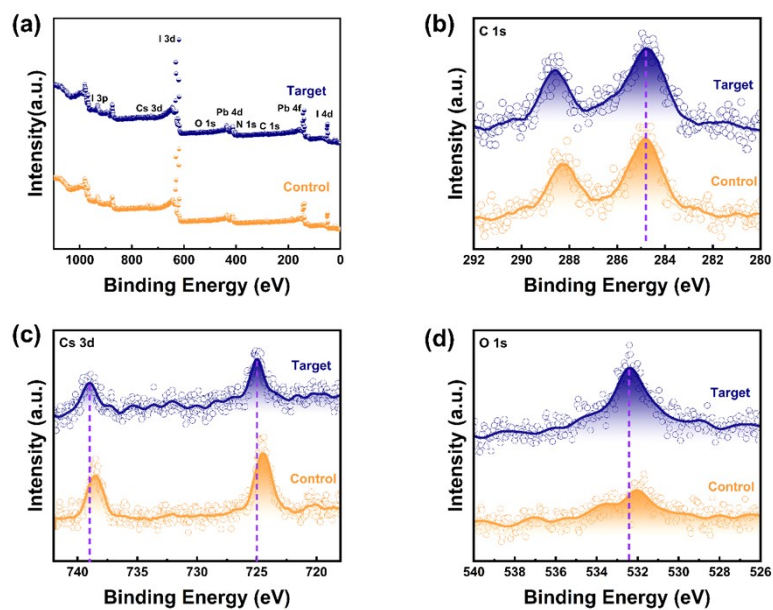

**Fig. S4** XPS of control and  $\text{NH}_4\text{NO}_3$ -passivated perovskite films: (a) XPS survey spectra; (b) C 1s; (c) Cs 3d; (d) O 1s.

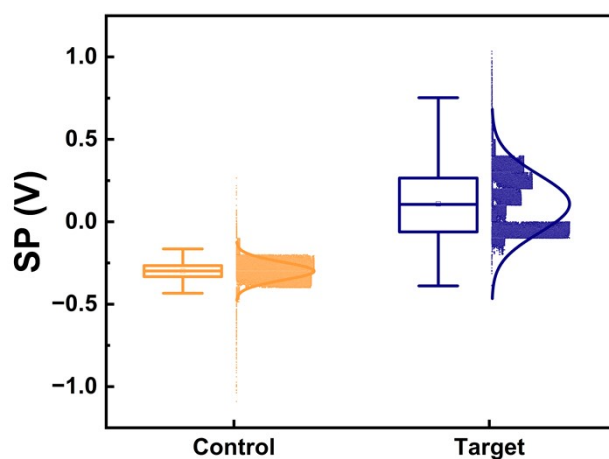

**Fig. S5** The values of SP statistics for KPFM of control and  $\text{NH}_4\text{NO}_3$ -passivated films.

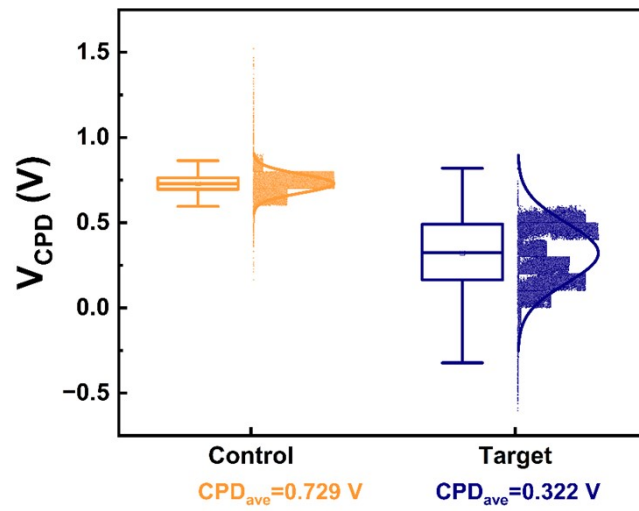

**Fig. S6** The values of CPD statistics and calculations for KPFM of control and  $\text{NH}_4\text{NO}_3$ -passivated films.

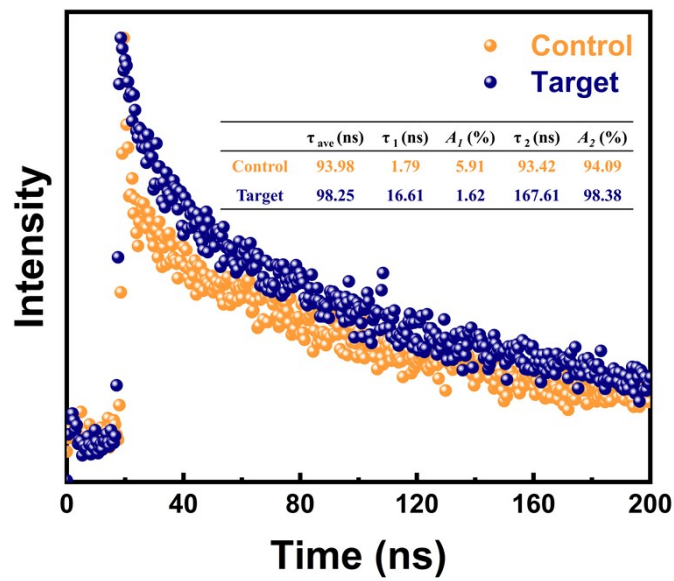

**Fig. S7** TRPL to investigate the effects of  $\text{NH}_4\text{NO}_3$  in the perovskite films.

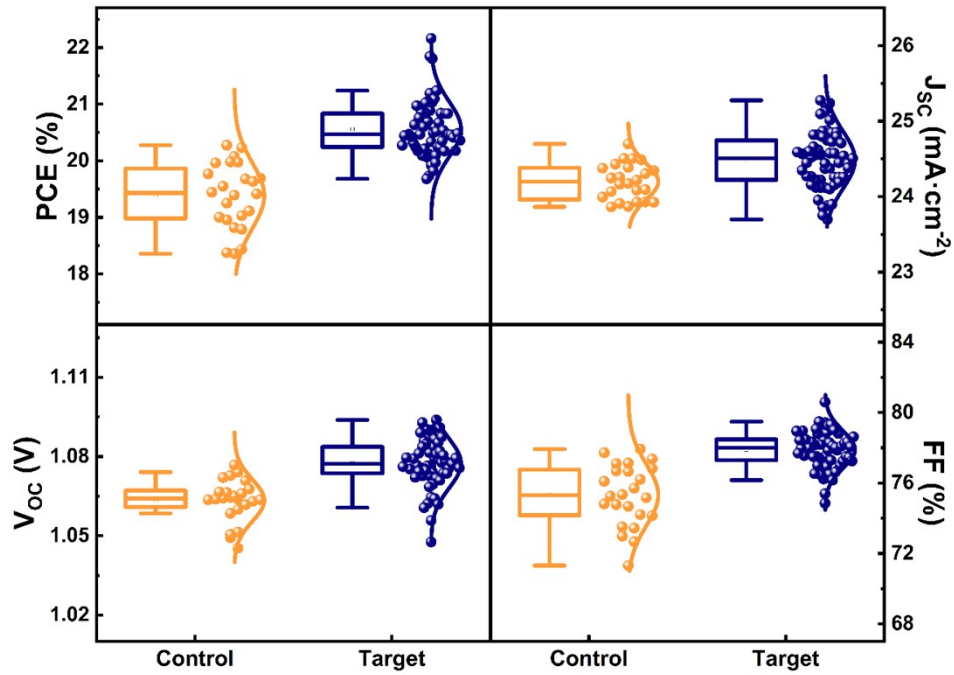

**Fig. S8** J-V characteristics of with/without  $\text{NH}_4\text{NO}_3$ -passivated devices under AM1.5G simulated solar illumination.

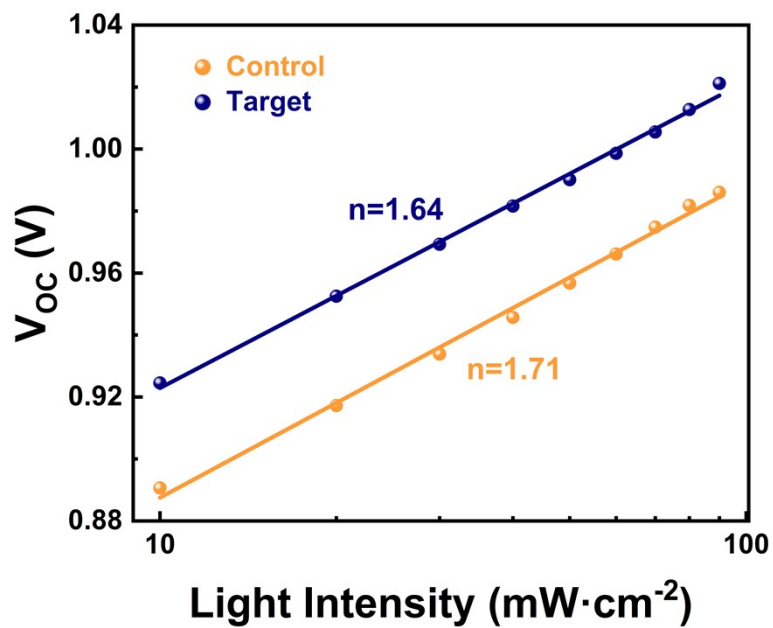

**Fig. S9** Light intensity-dependent  $V_{oc}$  of the control and target devices.



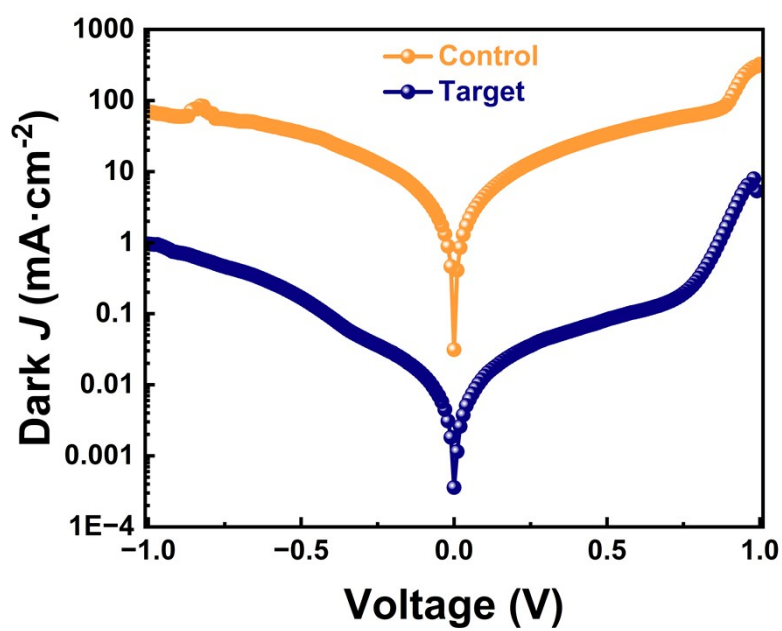

Fig. S10 Dark currents of the control and target devices.

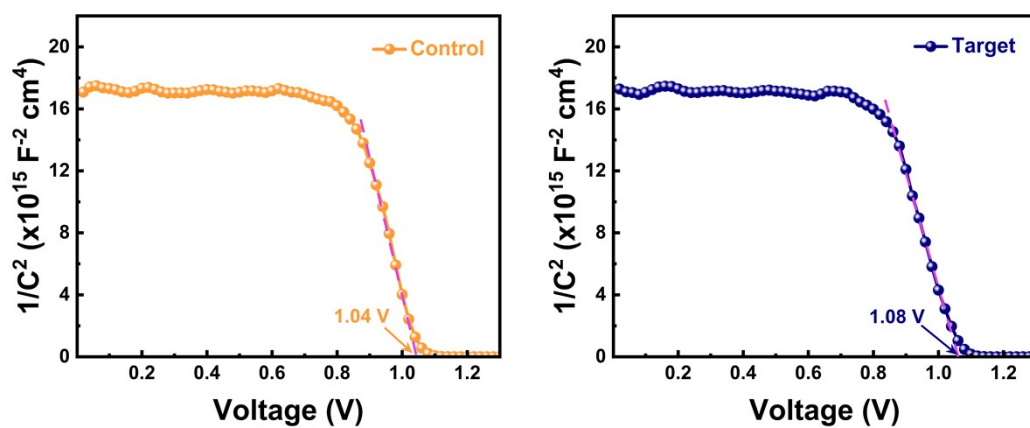

Fig. S11 Mott-Schottky curves of the control and target devices.

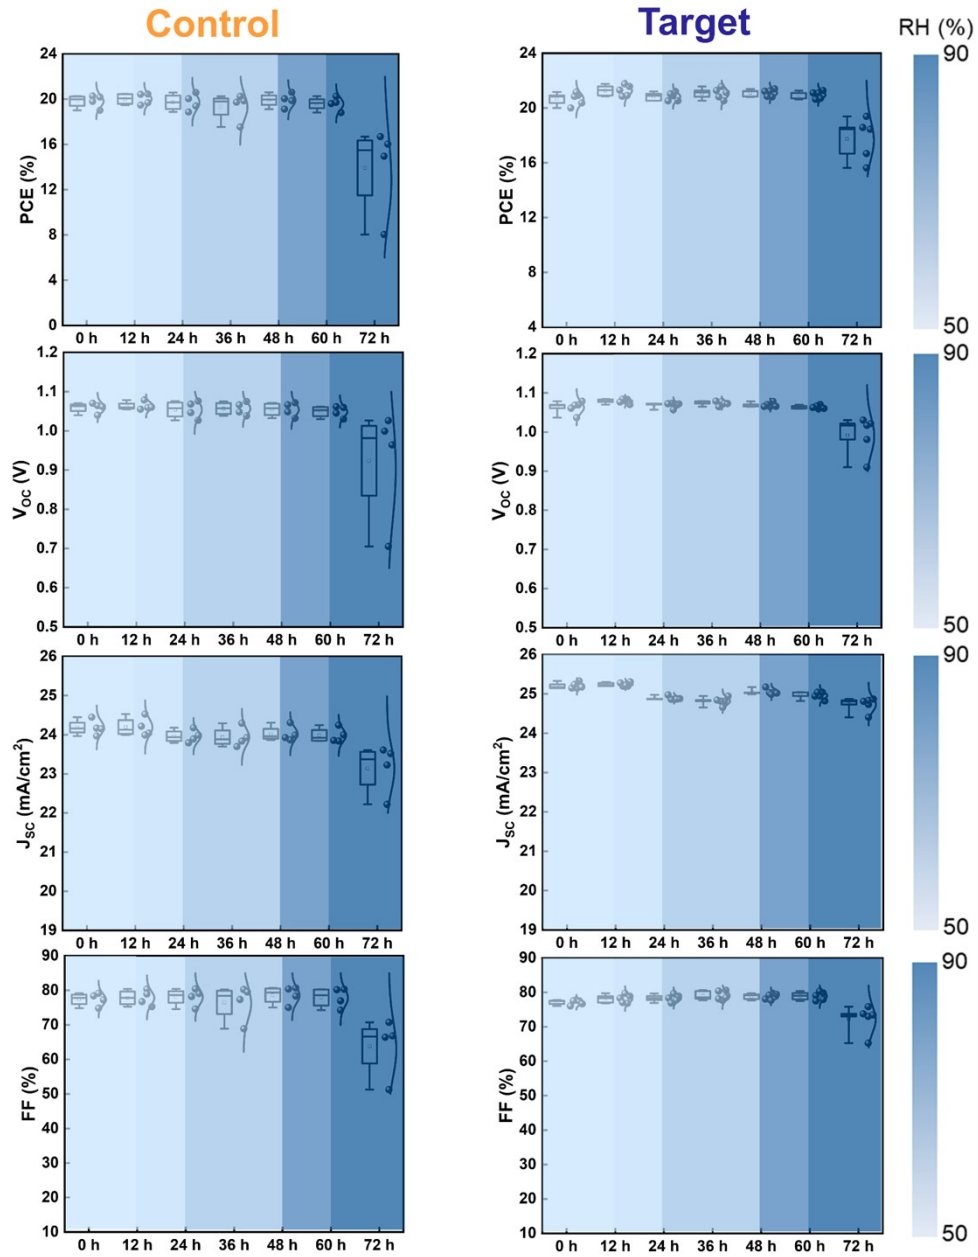

**Fig. S12** Stability test based on unencapsulated devices with and without  $\text{NH}_4\text{NO}_3$  stored in ambient air (RH=50-90%).

**Table S1. Grain boundaries passivation strategies towards perovskite solar cells.**

| Passivator                                                                             | Perovskite                                                                                          | Passivation methods               | PCE [%]<br>(C/P) | Ref. |
|----------------------------------------------------------------------------------------|-----------------------------------------------------------------------------------------------------|-----------------------------------|------------------|------|
| poly(methyl methacrylate)<br>(PMMA)                                                    | $\text{Cs}_{0.05}(\text{FA}_{0.9}\text{MA}_{0.1})_{0.95}\text{Pb}(\text{I}_{0.9}\text{Br}_{0.1})_3$ | Surface passivation<br>treatment  | 19.4/20.4        | 5    |
| 4-fluoro-<br>phenethylammonium iodide<br>(FPEAI)                                       | $\text{FA}_{0.85}\text{MA}_{0.15}\text{Pb}(\text{I}_{0.85}\text{Br}_{0.15})_3$                      | Surface passivation<br>treatment  | 18.46/20.53      | 6    |
| 3,4,5,6-<br>tetrafluorophthalic acid<br>(TFPA)                                         | $\text{FA}_{0.85}\text{MA}_{0.15}\text{PbI}_3$                                                      | Surface passivation<br>treatment  | 21.46/23.70      | 7    |
| N-(3-aminopropyl)-<br>imidazole diiodide (APDI)                                        | $\text{FA}_{0.83}\text{Cs}_{0.17}\text{Pb}(\text{I}_{0.86}\text{Br}_{0.14})_3$                      | Surface passivation<br>treatment  | 20.01/21.41      | 8    |
| phenethylammonium<br>chloride (PEACl)                                                  | $\text{FA}_{0.82}\text{Cs}_{0.18}\text{PbI}_3$                                                      | Additive and surface<br>treatment | 20.1/22.3        | 9    |
| poly(bithiophene imide)<br>(PBTI)                                                      | CsFAMA                                                                                              | Additive treatment                | 18.89/20.67      | 10   |
| p-phenyl<br>dimethylammonium iodide<br>(PhDMADI)                                       | $\text{FA}_{0.7}\text{MA}_{0.3}\text{Pb}_{0.5}\text{Sn}_{0.5}\text{I}_3$                            | Additive treatment                | 15.8/20.5        | 11   |
| $\text{K}_2\text{SO}_4$                                                                | CsFAMA                                                                                              | Additive treatment                | 20.39/22.4       | 12   |
| poly(6FDA-co-AHHFP<br>(PAA)                                                            | $\text{MAPbI}_3$                                                                                    | Additive treatment                | 17.53/20.03      | 13   |
| IDIS-Th                                                                                | $\text{MAPbI}_3$                                                                                    | Antisolvent treatment             | 17.78/20.01      | 14   |
| 2-(5,6-Difluoro-3-oxo-2,3-<br>dihydro-1H-inden-1<br>ylidene) malononitrile<br>(BTP-4F) | CsFAMA                                                                                              | Antisolvent treatment             | 19.25/22.16      | 15   |

**Table S2.** The change in PCE of devices in high humidity environments (statistics derived from 48 individual devices).

|                                                       | <i>Start PCE<sub>ave</sub> (%)</i> | <i>End PCE<sub>ave</sub> (%)</i> | <i>Rate of decline</i> |
|-------------------------------------------------------|------------------------------------|----------------------------------|------------------------|
| <b>Control (without NH<sub>4</sub>NO<sub>3</sub>)</b> | <b>18.14</b>                       | <b>11.91</b>                     | <b>34.36%</b>          |
| <b>Target (with NH<sub>4</sub>NO<sub>3</sub>)</b>     | <b>19.35</b>                       | <b>16.26</b>                     | <b>15.97%</b>          |

## Notes and references

1. Z. Kang, H. Si, M. Shi, C. Xu, W. Fan, S. Ma, A. Kausar, Q. Liao, Z. Zhang and Y. Zhang, *Sci. China-Mater.*, 2019, **62**, 776-789.
2. E. M. Lanzoni, T. Gallet, C. Spindler, O. Ramírez, C. K. Boumenou, S. Siebentritt and A. Redinger, *Nano Energy*, 2021, **88**, 106270.
3. A. Carbone, B. K. Kotowska and D. Kotowski, *Phys. Rev. Lett.*, 2005, **95**.
4. R. Lin, Y. Wang, Q. Lu, B. Tang, J. Li, H. Gao, Y. Gao, H. Li, C. Ding, J. Wen, P. Wu, C. Liu, S. Zhao, K. Xiao, Z. Liu, C. Ma, Y. Deng, L. Li, F. Fan and H. Tan, *Nature*, 2023, **620**, 994-1000.
5. E. Ochoa-Martinez, M. Ochoa, R. D. Ortuso, P. Ferdowsi, R. Carron, A. N. Tiwari, U. Steiner and M. Saliba, *ACS Energy Lett.*, 2021, **6**, 2626-2634.
6. H. B. Lee, N. Kumar, B. Tyagi, K.-J. Ko and J.-W. Kang, *Sol. RRL*, 2020, **5**.
7. Y. Yao, J. Zhang, H. Su, Y. Li, N. Li, T. Nie, L. Liu, X. Ren, N. Yuan, J. Ding and S. Liu, *Sol. RRL*, 2022, **7**, 2201025.
8. Y. Wang, J. Song, J. Ye, Y. Jin, X. Yin, Z. Su, L. Hu, Y. Wu, C. Qiu, H. Wang, W. Yan and Z. Li, *Chem. Commun.*, 2023, **59**, 6580-6583.
9. S. Gharibzadeh, P. Fassel, I. M. Hossain, P. Rohrbeck, M. Frericks, M. Schmidt, T. Duong, M. R. Khan, T. Abzieher, B. A. Nejjand, F. Schackmar, O. Almora, T. Feeney, R. Singh, D. Fuchs, U. Lemmer, J. P. Hofmann, S. A. L. Weber and U. W. Paetzold, *Energy Environ. Sci.*, 2021, **14**, 5875-5893.
10. W. Chen, Y. Wang, G. Pang, C. W. Koh, A. B. Djurišić, Y. Wu, B. Tu, F. z. Liu, R. Chen, H. Y. Woo, X. Guo and Z. He, *Adv. Funct. Mater.*, 2019, **29**.
11. L. Zhang, Q. Kang, Y. Song, D. Chi, S. Huang and G. He, *Sol. RRL*, 2021, **5**.
12. W. Wang, Q. Zhou, D. He, B. Liu, L. Bai, C. Xu, Q. Song, P. Zhao, C. Chen, K. Sun, H. Yang, Z. Zang, D. Lee and J. Chen, *Sol. RRL*, 2021, **6**, 2100893.
13. H. Luo, F. Tu, X. Chen, L. Xing, L. Cao, G. Ren, S. Ji, Y. Zhong, L. Xiao, W.-C. Chen, Q.-D. Yang, C. Yang and Y. Huo, *J. Mater. Chem. A*, 2023, **11**, 8791-8797.
14. C. Song, X. Li, Y. Wang, S. Fu, L. Wan, S. Liu, W. Zhang, W. Song and J. Fang, *J. Mater. Chem. A*, 2019, **7**, 19881-19888.
15. Y. B. Gao, Y. J. Wu, Y. Liu, M. Lu, L. L. Yang, Y. H. Wang, W. W. Yu, X. Bai, Y. Zhang and Q. L. Dai, *Nanoscale Horiz*, 2020, **5**, 1574-1585.
